# Supplementary figures and images for: Maternal immune activation dysregulation of the fetal brain transcriptome and relevance to the pathophysiology of autism spectrum disorder
Source: Springer Nature journal article supplement (doi:10.1038/mp.2017.15), 2017-03-21

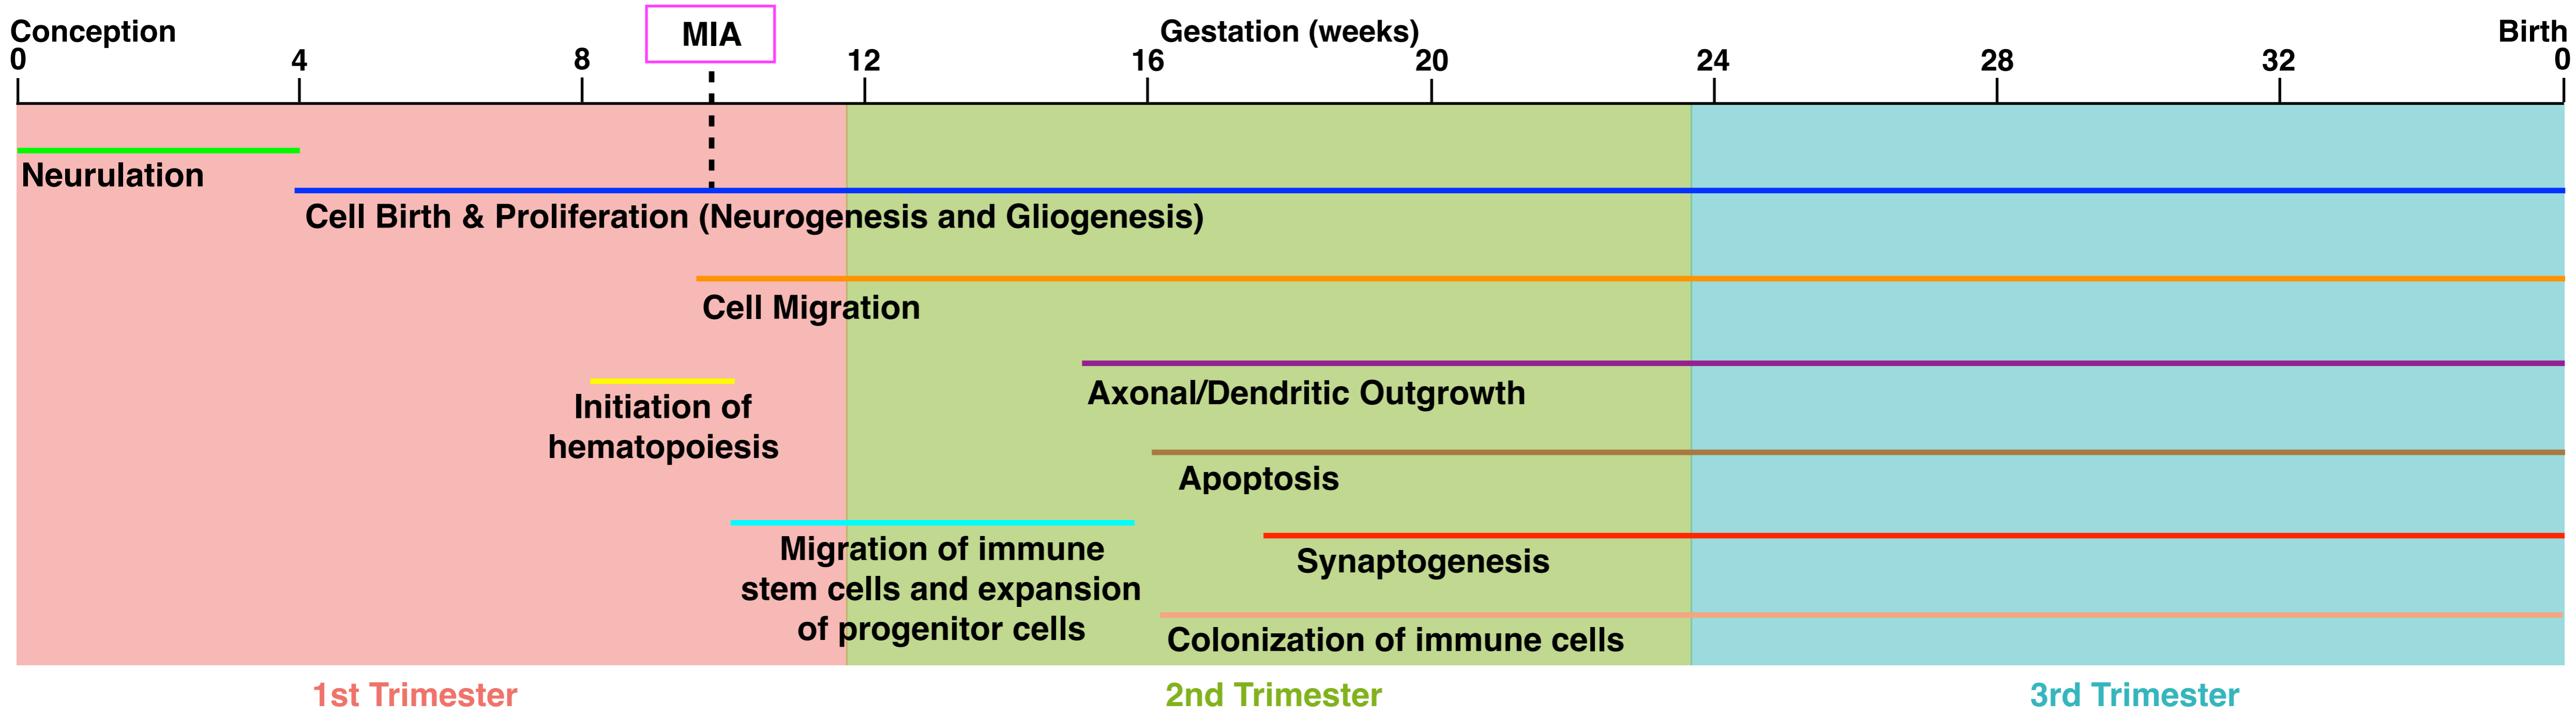

Supplement: 41380_2018_BFmp201715_MOESM177_ESM.pdf [file 41380_2018_BFmp201715_MOESM177_ESM.pdf]
